# Supplementary material for: Novel antibacterial electrospun materials based on polyelectrolyte complexes of a quaternized chitosan derivative
Source: Royal Society of Chemistry journal article supplement (doi:10.1039/c5ra08484a), 2015-01-01
Supplement: c5ra08484a1.pdf [file c5ra08484a1.pdf]

## Electronic Supplementary Information

### Novel antibacterial electrospun materials based on polyelectrolyte complexes of a quaternized chitosan derivative

Kalin N. Kalinov, Milena G. Ignatova, Nevena E. Manolova, Nadya D. Markova, Daniela B. Karashanova and Iliya B. Rashkov

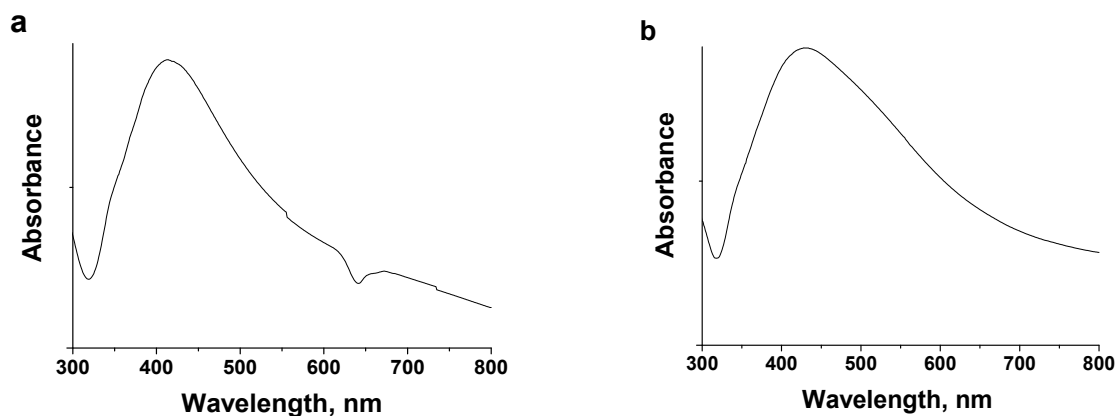

**Fig. S1** UV-VIS spectra of AgNPs prepared: in 85% HCOOH (a) and in 85% HCOOH in the presence of TMCh (b). Ag NO<sub>3</sub> concentration – 0.08 mol.L<sup>-1</sup>.

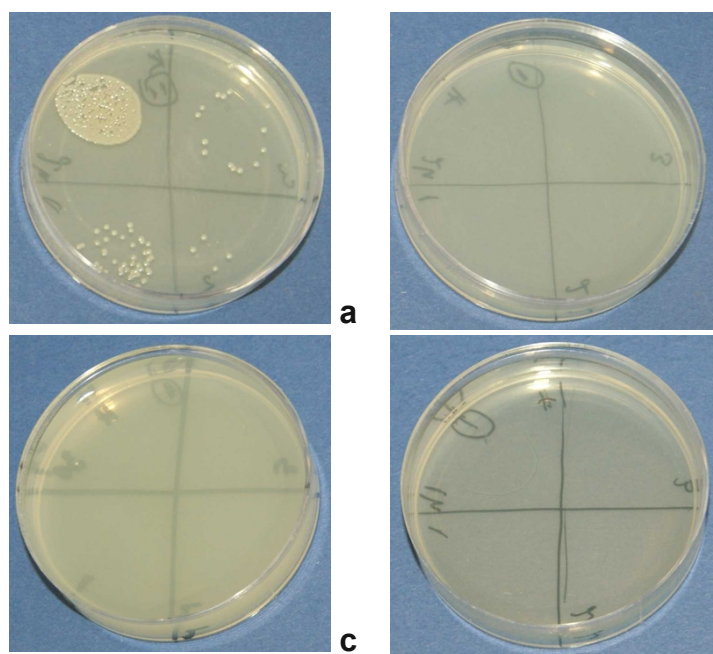

**Fig. S2** Digital photographs of antibacterial activity of nanofibrous materials from PEC TMCh/PAA and TMCh/PAMPS and from AgNPS-containing TMCh/PAA against *S. aureus* evaluated by viable cell-counting method after 180-min of incubation. (a) control – bacteria cell suspension, (b) TMCh/PAA mat, (c) TMCh/PAMPS mat and (d) TMCh/PAA/AgNPs mat.

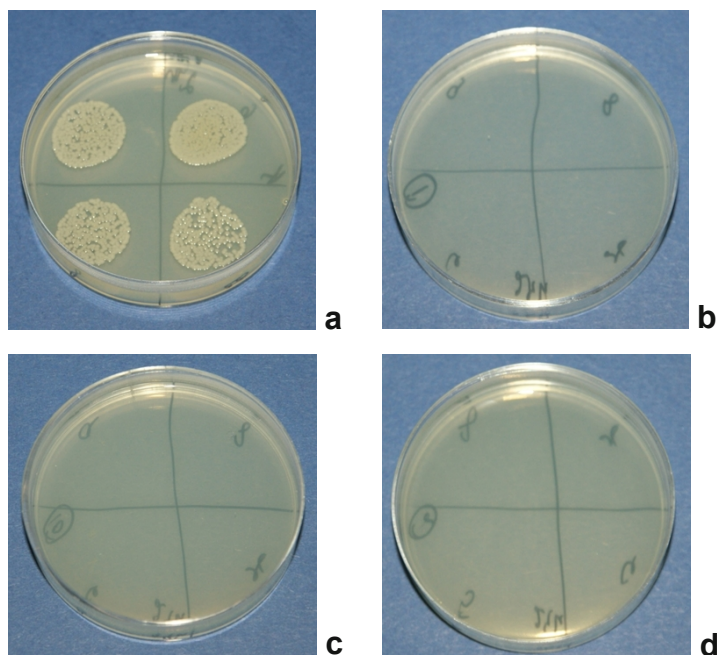

**Fig. S3** Digital photographs of antibacterial activity of nanofibrous materials from PEC TMCh/PAA and TMCh/PAMPS and from AgNPS-containing TMCh/PAA against *E. coli* evaluated by viable cell-counting method after 1440-min of incubation. (a) control – bacteria cell suspension, (b) TMCh/PAA mat, (c) TMCh/PAMPS mat and (d) TMCh/PAA/AgNPs mat.
